# Supplementary material
Source: Springer Nature journal article supplement (https://www.springermedizin.de/resource/supplementary/12874_2010_519_MOESM2_ESM.pdf/9432502)
Supplement: MOESM2 [file 9432502]

Advertisement-recruited bicycle-commuting women's mean scores for differences in ratings of the inner urban and suburban route environments

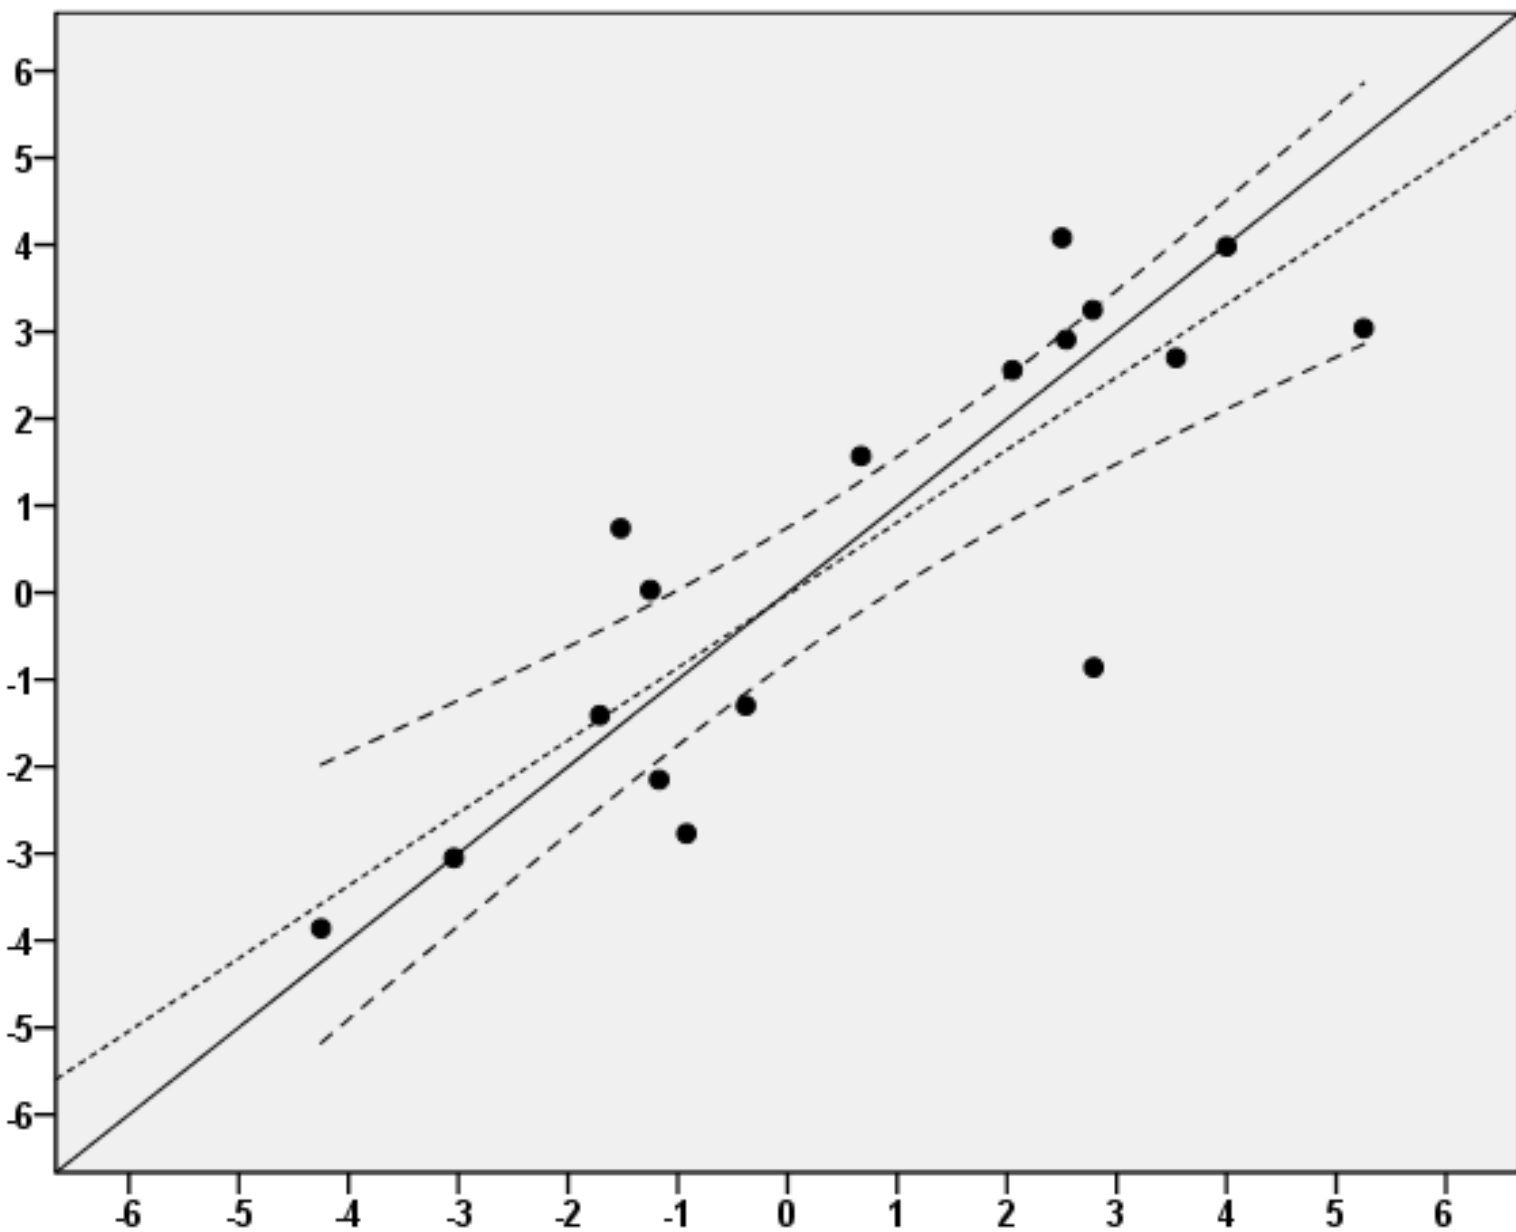

Experts' mean scores for differences in ratings of the inner urban and suburban route environments
